# Supplementary material for: The Genotype-Phenotype Correlation in Human 5α-Reductase Type 2 Deficiency: Classified and Analyzed from a SRD5A2 Structural Perspective
Source: MDPI journal article supplement (doi:10.3390/ijms24043297), 2023-02-07
Supplement: s1 [file s1]

**Figure S1.** The *SRD5A2* mutational spectrum and frequencies in 19 Korean children with 5 $\alpha$ RD2

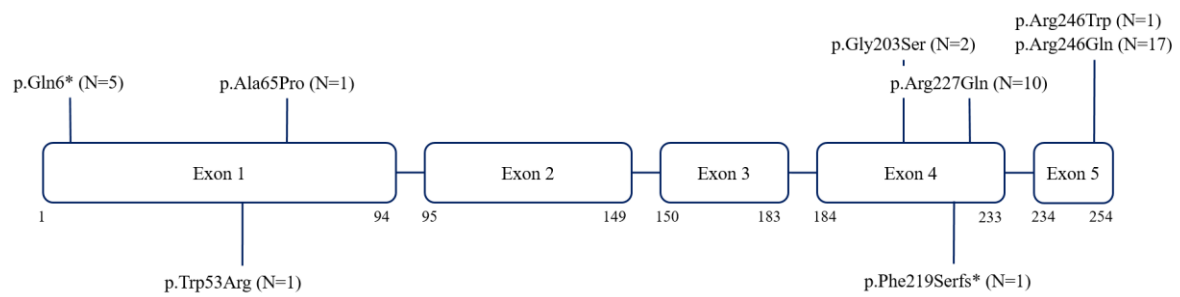

**Table S1.** The testosterone (T), dihydrotestosterone (DHT), and T/DHT ratio levels at baseline and after human chorionic gonadotropin (hCG) stimulation

|         | Patient     | Age  | Baseline |         |       | After hCG stimulation |          |       |      |
|---------|-------------|------|----------|---------|-------|-----------------------|----------|-------|------|
|         | No.         | (yr) | T        | DHT     | T/DHT | T                     | DHT      | T/DHT |      |
|         |             |      | (ng/dL)  | (ng/dL) |       | (ng/dL)               | (ng/dL)  |       |      |
| p.R227Q | 1           | 9.7  | <2.5     | 2       | <1.3  | 106.3                 | 8        | 13.3  |      |
|         |             | 13.1 | 224.6    | 12      | 18.7  |                       |          |       |      |
|         |             | 13.3 | 121.3    | 7       | 17.3  |                       |          |       |      |
|         |             | 16.0 | 483.0    | 10      | 48.3  |                       |          |       |      |
|         |             | 16.5 | 468.0    | 9       | 52.0  |                       |          |       |      |
|         |             | 17.0 | 425.0    | 14      | 30.4  |                       |          |       |      |
|         | 2           | 1.3  | <2.5     | 5       | <0.5  | 507.0                 | 9        | 56.3  |      |
|         | 3           | 0.5  | 10       | 2       | 5.0   | 217.6                 | 22       | 9.9   |      |
|         | 4           | 0.9  | <2.5     | -       | -     | 309.0                 | 9        | 34.3  |      |
|         | 5           | 0.8  | <2.5     | 2       | <1.3  | 610.0                 | 35       | 17.4  |      |
|         | 6           | 5.5  | <2.5     | 2       | <1.3  | 300.9                 | 7        | 43.0  |      |
|         | 7           | 12.7 | 559.3    | 9       | 62.1  | 1149.0                | 18       | 63.8  |      |
|         | 8           | 11.8 | 17.3     | 5       | 3.5   | 203.7                 | 8        | 25.5  |      |
|         |             | 13.5 | 158      | 11      | 14.4  |                       |          |       |      |
|         |             | 13.9 | 182.3    | 14      | 13.0  |                       |          |       |      |
|         |             | 17.9 | 266.0    | 10      | 26.6  |                       |          |       |      |
|         | 9           | 0.6  | <2.5     | 2       | <1.3  | 427.1                 | 25       | 17.1  |      |
|         | Non-p.R227Q | 10   | 0.0      | 192.0   | 44    | 4.4                   | 587.0    | 69    | 8.5  |
|         |             | 11   | 0.7      | <2.5    | 2     | <1.3                  | 846.8    | 24    | 35.3 |
|         |             | 12   | 0.0      | 154.0   | 22    | 7.0                   | Not done |       |      |
|         |             | 13   | 4.6      | <2.5    | 2     | <1.3                  | 166.4    | 7     | 23.8 |
|         |             | 14   | 16.5     | 623.3   | 48    | 13.0                  | 1267.0   | 83    | 15.3 |
|         |             | 15   | 0.1      | 118.7   | 23    | 5.2                   | 458.2    | 65    | 7.0  |
|         |             |      | 12.4     | 170.5   | 23    | 7.4                   | 660.7    | 44    | 15.0 |
|         |             | 16   | 0.1      | 240.8   | 24    | 10.0                  | 567.3    | 46    | 12.3 |
|         |             | 17   | 2.6      | 4.0     | 1     | 4.0                   | 279.7    | 3     | 93.2 |
|         |             | 18   | 10.5     | 7.4     | 4     | 1.9                   | 37.0     | 4     | 9.3  |
|         |             | 19   | 9.9      | <2.5    | 5     | <0.5                  | 330.0    | 5     | 66.0 |
| Median  |             | 9.8  | 120.0    | 9.0     | 5.2   | 427.1                 | 18.0     | 17.4  |      |
| Minimum |             | 0.0  | <2.5     | 1.0     | <0.5  | 37.0                  | 3.0      | 7.0   |      |
| Maximum |             | 17.9 | 623.3    | 48.0    | 62.1  | 1267.0                | 83.0     | 93.2  |      |

**Table S2.** The testosterone (T), dihydrotestosterone (DHT), and T/DHT ratio levels at baseline and after human chorionic gonadotropin (hCG) stimulation according to age

| Age             | N               | Baseline               |                     |                    | N        | After hCG stimulation    |                     |                     |
|-----------------|-----------------|------------------------|---------------------|--------------------|----------|--------------------------|---------------------|---------------------|
|                 |                 | T                      | DHT                 | T/DHT              |          | T                        | DHT                 | T/DHT               |
|                 |                 | (ng/dL)                | (ng/dL)             |                    |          | (ng/dL)                  | (ng/dL)             |                     |
| < 6 mon         | 4*              | 173.0<br>(118.7–240.8) | 23.5<br>(22.0–44.0) | 6.1<br>(4.4–10.0)  | 3*       | 567.3<br>(458.2–587.0)   | 65.0<br>(46.0–69.0) | 8.5<br>(7.0–12.3)   |
| 6 mon–12 yr     | 12              | 2.5<br>(2.5–17.3)      | 2.0<br>(1.0–5.0)    | 1.3<br>(0.5–5.0)   | 13       | 300.9<br>(37.0–846.8.0)  | 8.0<br>(3.0–35.0)   | 25.5<br>(9.3–93.2)  |
| p.R227Q         | 7               | 2.5<br>(2.5–17.3)      | 2.0<br>(2.0–5.0)    | 1.3<br>(0.5–5.0)   | 8        | 305.0<br>(106.3–610.0)   | 9.0<br>(7.0–35.0)   | 21.4<br>(9.9–56.3)  |
| Non-<br>p.R227Q | 5               | 2.5<br>(2.5–7.4)       | 2.0<br>(1.0–5.0)    | 1.3<br>(0.5–4.0)   | 5        | 279.7<br>(37.0–846.8)    | 5.0<br>(3.0–24.0)   | 35.3<br>(9.3–93.2)  |
|                 | <i>P</i>        |                        |                     |                    | <i>P</i> |                          |                     |                     |
| > 12 yr         | 11 <sup>†</sup> | 266.0<br>(121.3–623.3) | 11.0<br>(7.0–48.0)  | 18.7<br>(7.4–62.1) | 3        | 1149.0<br>(660.7–1267.0) | 44.0<br>(18.0–83.0) | 15.3<br>(15.0–63.8) |

All data shows as median (min–max).

\*all participants are non-p.R227Q variant allele group.

<sup>†</sup>Only two participants are non-p.R227Q variant group.

**Note S1.** List of 404 genes included in the custom panel for DSD-related genes

ABCA1, ABCC8, ABCG1, ABCG5, ABCG8, ADRB2, ADRB3, AGL, AGPAT2, AGRP, AIP, AIRE, AKAP2, AKR1C2, AKR1C4, AKT2, ALMS1, AMH, AMHR2, ANGPTL3, ANOS1, AP2S1, APC, APOA1, APOA4, APOA5, APOB, APOC2, APOC3, APOE, APPL1, AQP2, AR, ARAP1, ARL4D, ARL6, ARMC5, ARX, ATP1A1, ATP2B3, ATP7A, ATRX, AVP, AVPR2, BBS1, BBS10, BBS12, BBS2, BBS4, BBS5, BBS7, BBS9, BDNF, BLK, BMP15, BRAF, BSCL2, BTK, CA2, CACNA1D, CARTPT, CASR, CAV1, CAV2, CBX2, CCND1, CDC73, CDKL5, CDKN1A, CDKN1B, CDKN1C, CDKN2B, CDKN2C, CEL, CEP290, CEP41, CETP, CHD7, CIDEC, CISD2, CLCN7, COL1A1, COL1A2, COL3A1, COL5A1, COL5A2, COL9A1, COL9A2, COL9A3, COLEC11, COMP, CP, CREB3L3, CREBBP, CRTAP, CRTCL, CRY2, CUL3, CUL4B, CYB5A, CYP11A1, CYP11B1, CYP11B2, CYP17A1, CYP19A1, CYP21A2, DDH2, DHCR24, DHCR7, DHH, DMRT1, DMRT2, DNAJC3, DUSP6, DYRK1B, EGLN1, EIF2AK3, ELN, EMX2, ENPP1, EPAS1, FBP1, FERMT3, FEZF1, FGD1, FGF17, FGF8, FGF9, FGFR1, FGFR2, FH, FIGLA, FKBP10, FLRT3, FOXC2, FOXE1, FOXL2, FOXP3, FRAS1, FREM2, FSHB, FSHR, G6PC, GALNT2, GATA3, GATA4, GATA6, GBE1, GCK, GCKR, GCM2, GDF9, GHR, GHRL, GLI2, GLI3, GLIS3, GLUD1, GNA11, GNAS, GNRH1, GNRHR, GPD1, GPIHBP1, GPR161, GRIP1, GYS2, HADH, HADHA, HADHB, HESX1, HFE, HHIP, HIRA, HNF1A, HNF1B, HNF4A, HOXA13, HRAS, HS6ST1, HSD17B3, HSD3B1, HSD3B2, ICK, IER3IP1, IFIH1, IFITM5, IGFALS, IKBKG, IL17RD, INS, INSL3, INSR, IRF6, IYD, KAT6B, KCNJ11, KCNJ5, KIF1B, KISS1, KISS1R, KLF11, KLHL3, KRAS, LCAT, LDLR, LDLRAP1, LEP, LEPR, LHB, LHCGR, LHX3, LHX4, LIMK1, LIPA, LIPC, LIPE, LIPG, LMF1, LMNA, LMNB2, LPIN1, LPL, LRP5, LRP6, MADD, MAGEL2, MAMLD1, MAP2K1, MAP2K2, MAP3K1, MATN3, MAX, MC2R, MC3R, MC4R, MCM4, MEF2A, MEN1, MKKS, MKS1, MLXIPL, MTPP, MYLIP, NEUROD1, NEUROG3, NF1, NIPBL, NKX2-1, NKX2-5, NLGN4X, NNT, NOBOX, NOTCH2, NPC1L1, NR0B1, NR0B2, NR5A1, NRAS, NSMF, NTRK1, NTRK2, OCRL, OPHN1, OSTM1, OTC, OTX1, OTX2, P3H1, PAX4, PAX8, PAX9, PCK1, PCK2, PCSK1, PCSK9, PDX1, PHF6, PHIP, PHKA2, PHKB, PHKG2, PITX2, PLEKHM1, PLIN1, PLOD1, PLOD2, PLTP, PNPLA2, POLD1, POMC, POR, POU1F1, PPARA, PPARG, PPARGC1B, PPIB, PRKAR1A, PROK2, PROKR2, PROP1, PSMC3IP, PTEN, PTF1A, PTH, PTH1R, PTPN11, PTRF, PYGL, PYY, RASGRP2, RB1, RET, RFX6, ROR2, RSPO1, RXFP2, SALL1, SAR1B, SCARB1, SDC3, SDCCAG8, SDHA, SDHAF2, SDHB, SDHC, SDHD, SECISBP2, SEMA3A, SEMA3E, SERPINF1, SERPINH1, SIM1, SLC16A1, SLC16A2, SLC26A2, SLC26A4, SLC2A2, SLC37A4, SLC39A13, SLC5A5, SLC9A3R1, SORT1, SOX10, SOX2, SOX3, SOX9, SP7, SPECC1L, SPRY4, SRA1, SRD5A2, SREBF1, SRXX2, SRXX3, SRXY10, SRY, STAP1, STAR, STK11, STS, STX16, SULT2A1, TAC3, TACR3, TBC1D4, TBCE, TCIRG1, TCTN3, TG, THRA, THRB, TMEM127, TMEM38B, TNFRSF11A, TNFSF11, TP53, TPO, TRHR, TRIB1, TRIM32, TSHB, TSHR, TSPYL1, TTC8, UBR1, UCP1, UCP2, UCP3, VHL, VPS13B, WDPCP, WDR11, WFS1, WNK1, WNK4, WNT1, WNT4, WNT7A, WRN, WT1, WWOX, ZFP57, ZFPM2
